# Supplementary material
Source: PubMed Central journal article supplement (PMC3060219)
Supplement: 1018217108_pnas.201018217SI.pdf [file 1018217108_pnas.201018217SI.pdf]

# Supporting Information

Belgacem and Borodinsky 10.1073/pnas.1018217108



**Fig. S1.** (A and B) Expression of Shh and Smo in the developing spinal cord. Transverse sections from stage-24 embryos were processed for immunostaining. Outlined are the notochord (Not) and neural tube. (B) (Right) Enlarged view (2.5 $\times$  magnification) of the squared region in the left panel showing expression of Smo at the spinal cell primary cilium. (Scale bars, 20  $\mu$ m.) (C) Effectiveness of Smo and SmoM2 misexpression and specificity of the Smo antibody. Embryos at the two-cell stage were microinjected with 300 pg mRNA encoding human Smo or 150 pg mRNA encoding SmoM2 along with 20 mg/mL dextran-Alexa Fluor 594 conjugate. Protein extracts from 10 neural tubes from stage-24 (26-h-old) embryos injected with Smo, SmoM2, or tracer only (Control) were processed for Western blots, and membranes were probed with anti-Smo and anti-GAPDH.



**Fig. S2.** Shh signaling regulates neuronal Ca<sup>2+</sup> spike activity in vitro. Neuronal cultures grown for 7 h were loaded with 1  $\mu$ M fluo4-AM and imaged for 30 min before (Control) and after addition of drugs. Values are mean  $\pm$  SEM incidence of spiking cells and frequency of spikes per cell during the recording before and after the addition of 100 nM N-Shh or 20  $\mu$ M cyclopamine (Cyclo).  $n = 5$  cultures per experimental group; \* $P < 0.05$  compared with control using unpaired (incidence of spiking cells) and paired (frequency)  $t$  test.



**Fig. 53.** Overexpression of dominant negative and constitutively active forms of PKA in developing embryos. (A–F) Four nanoliters of 250 ng/ $\mu$ L mRNA encoding constitutively active (CQR) (A–C) or dominant negative (RAB) (D–F) forms of PKA along with 20 mg/mL dextran-Alexa Fluor 594 conjugate were microinjected and electroporated into neural tubes of stage-19 embryos.  $Ca^{2+}$  spike activity (A, B, D, and E) was assessed 6 h after electroporation followed by whole-mount immunostaining for PKA $\alpha$  catalytic subunit (C) and PKA $\alpha$  regulatory subunit (F). Outlined cells exhibited  $Ca^{2+}$  spikes during 30-min recordings, before (A and D) and after (B and E) the addition of 100 nM SAG. (G and H) Whole-mount immunostaining of tracer-only electroporated embryos for PKA $\alpha$  catalytic subunit (G) and PKA $\alpha$  regulatory subunit (H). (Scale bars, 20  $\mu$ m.) (I and J) Protein extracts from 10 neural tubes from CQR-, RAB-, and tracer only (Control) injected stage-24 embryos were processed for Western blots.



**Fig. 54.** Molecular knockdown of TRPC1 expression in developing embryos. Embryos at the two-cell stage were microinjected with 100 pg xTRPC1 morpholino (MO) or control morpholino (CMO) along with 20 mg/mL dextran-Alexa Fluor 594 conjugate. Protein extracts from 10 neural tubes of stage-24 (26-h-old) embryos injected with MO, CMO, or tracer only (Control) were processed for Western blots, and membranes were probed with anti-xTRPC1 and anti-GAPDH. Graph represents mean  $\pm$  SEM percent of normalized OD from three experiments; \* $P \leq 0.0001$ .





**Fig. S6.** Group I metabotropic glutamate receptor (mGluR) agonist elicits global IP3 transients correlated with  $\text{Ca}^{2+}$  transients. Cells were cultured for 9 h followed by simultaneous  $\text{Ca}^{2+}$  (Upper) and IP3 (Lower) imaging in the presence of 50  $\mu\text{M}$  dihydroxyphenylglycol (DHPG) applied at 10 s. Results reveal global IP3 elevation throughout the cytosol that precedes the  $\text{Ca}^{2+}$  transient by several seconds.  $n = 5$ . (Scale bar, 10  $\mu\text{m}$ .)



**Fig. S7.** Total number of cells and the number of progenitors are not affected by  $\text{Ca}^{2+}$  spike activity or Shh signaling during late stages of spinal cord development. (A) Diagram of the experimental design: Beads loaded with the agents indicated in B were implanted at stage 19. Embryos were allowed to grow for 1 d and were processed for immunostaining. (B) Transverse sections from stage-34 embryos; dorsal is at the top. VGC block, voltage-gated  $\text{Na}^+$  and  $\text{Ca}^{2+}$  channel blockers. Numbers are mean  $\pm$  SEM immunopositive cells or DAPI-labeled nuclei/100  $\mu\text{m}$  of spinal cord.  $n \geq 20$  sections/embryo, five embryos per experimental group. (Scale bar, 20  $\mu\text{m}$ .)



**Fig. S8.**  $\text{Na}^+$  and  $\text{Ca}^{2+}$  channel modulators override Shh action on  $\text{Ca}^{2+}$  spike activity. Ventral neural tubes were exposed and loaded with fluo4-AM.  $\text{Ca}^{2+}$  imaging was done before and after the addition of the combination of 100 nM SAG and  $\text{Na}^+$  and  $\text{Ca}^{2+}$  voltage-gated channel blockers (SAG+VGC<sub>block</sub>) or with the combination of 20  $\mu\text{M}$  cyclopamine and 1  $\mu\text{M}$  veratridine (Cyclo+Verat). Values are the mean  $\pm$  SEM percent incidence of spiking cells during 30-min recording before (Control) and after addition of indicated drugs.  $n = 5$  stage-24 (26-h postfertilization) embryos per experimental group; \* $P < 0.01$ .
